# Supplementary material for: Quantification of spatio-temporal scales of dynamical heterogeneity of water near lipid membranes above supercooling
Source: Royal Society of Chemistry journal article supplement (doi:10.1039/c9sm01725a), 2019-01-01
Supplement: c9sm01725a1.pdf [file c9sm01725a1.pdf]

Supplementary information for "Quantification of spatio-temporal scales of  
dynamical heterogeneity of water near lipid membranes above supercooling"

Abhinav Srivastava<sup>†</sup>, Smarajit Karmakar<sup>‡</sup> and Ananya Debnath<sup>† 1</sup>

<sup>†</sup>Department of Chemistry, Indian Institute of Technology Jodhpur, Jodhpur 342037, India.

<sup>‡</sup> Centre for Interdisciplinary Sciences, Tata Institute of Fundamental Research, Hyderabad 500107,  
India.

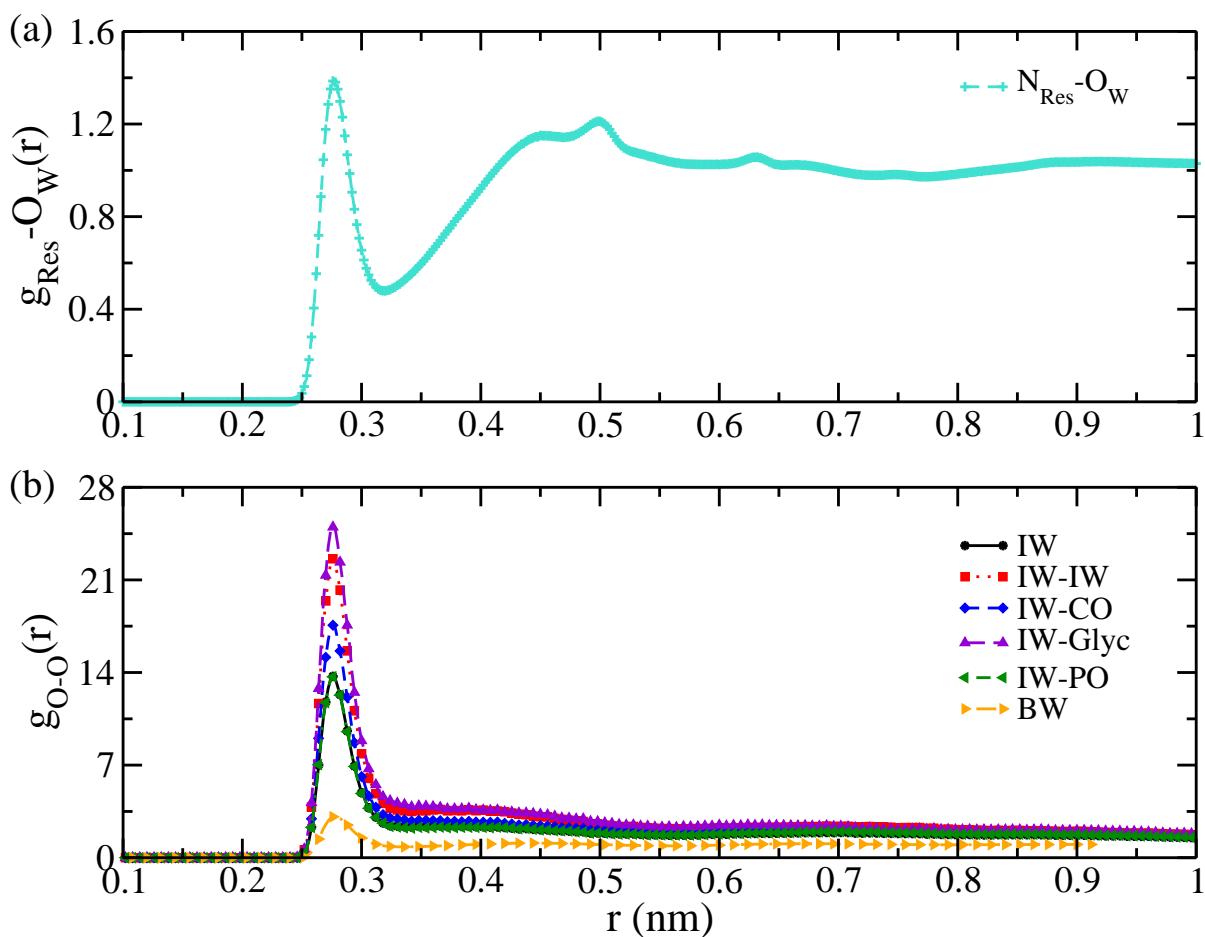

Figure S1: RDF for different classes of IW between a) oxygen-nitrogen of lipid heads and b) oxygen-oxygen of IW.

<sup>1</sup>e.mail:ananya@iitj.ac.in

## 0.1 Survival probability

Survival probability is an important quantity governing relaxation dynamics of water. Survival probability ( $P_i^d$ ) is defined as the probability (which can be either 0 or 1) of  $i^{th}$  water molecule residing in a given layer  $d$  for a time duration  $t$ .  $P_i^d$  is calculated using following equation,

$$S(t) = \sum_{i=1}^N \left\langle \prod_{t_k=t_0}^{t_0+t} P_i^d(t_k) \right\rangle \quad (1)$$

where,  $N$  denotes total number of molecules, angular bracket denotes averaging over time origins  $t_0$ .  $P_i^d$  is calculated for water residing in vicinity of the headgroup of DMPC for 1 ns time window. The

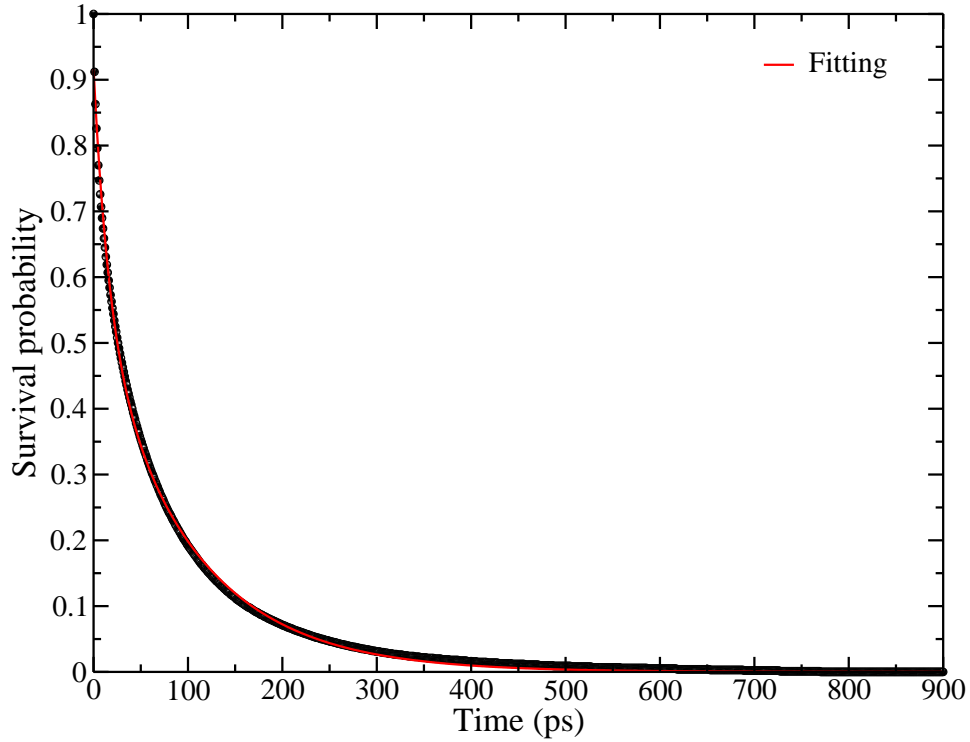

Figure S2: Survival probability of water analyzed over 1 ns time window. Solid red line show bi-exponential fitting.

residence time scales for water are quantified by fitting the survival probability to bi-exponential function given by equation 2.

$$y = A_f \exp\left(-\frac{t}{\tau_f}\right) + A_s \exp\left(-\frac{t}{\tau_s}\right) \quad (2)$$

Table S1: Residence time scales for water analyzed over 1 ns time window. Correlation coefficient is  $>0.99$ .

| $A_f$ | $\tau_f$<br>(ps) | $A_s$ | $\tau_s$<br>(ps) |
|-------|------------------|-------|------------------|
| 0.38  | 16.40            | 0.54  | 99.56            |

where,  $\tau_f$  and  $\tau_s$  denote fast and slow residence time scales,  $A_f$  and  $A_s$  show coefficients associated with fast and slow time scales respectively.

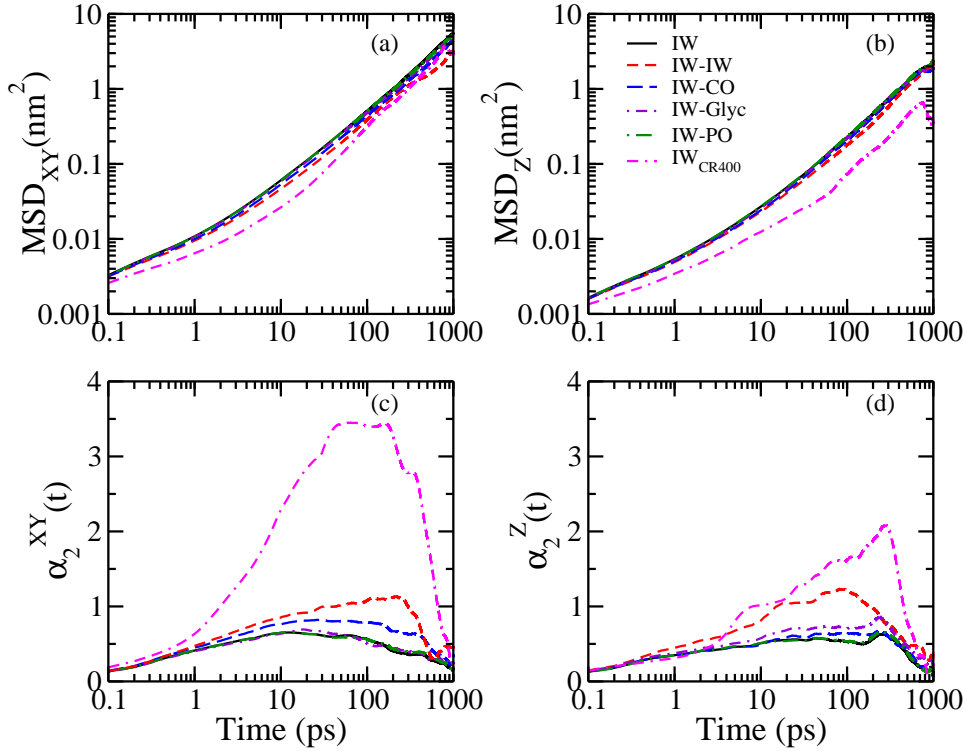

Figure S3: Translational mean square displacement for all classes of IW molecules along a) xy, b) z. NGP for all classes of IW molecules along c) xy and d) z.

## 0.2 Reorientational auto-correlation function (RACF)

For quantifying rotational dynamics, we computed reorientational auto-correlation function of lipid head, tail and IW. RACF is characterized by  $l^{\text{th}}$  order Legendre polynomial given by the following equation,

$$C_{vl}(t) = \frac{\langle \sum_{i=1}^N P_l[e_i^v(t) \cdot e_i^v(0)] \rangle}{\langle \sum_{i=1}^N P_l[e_i^v(0) \cdot e_i^v(0)] \rangle} \quad (3)$$

where,  $e_i^v(t)$  is the vector for which RACF is calculated and  $P_l$  is the  $l^{\text{th}}$  order Legendre polynomial. We calculated RACF for IW and atoms of DMPC lipids. For IW, RACF is calculated for the vector normal to the plane of OHH. For DMPC lipids, RACF is calculated for carbonyl moiety which is averaged for both alkyl chains and for atoms of sn-1 and sn-2 chain averaged over both chains. RACF ( $\hat{n}$ ) for all cases is shown in figure S4. For extracting the time scale, RACF is fitted with bi-exponential function as,

$$y = A_f \exp\left(-\frac{t}{\tau_f}\right) + A_s \exp\left(-\frac{t}{\tau_s}\right) \quad (4)$$

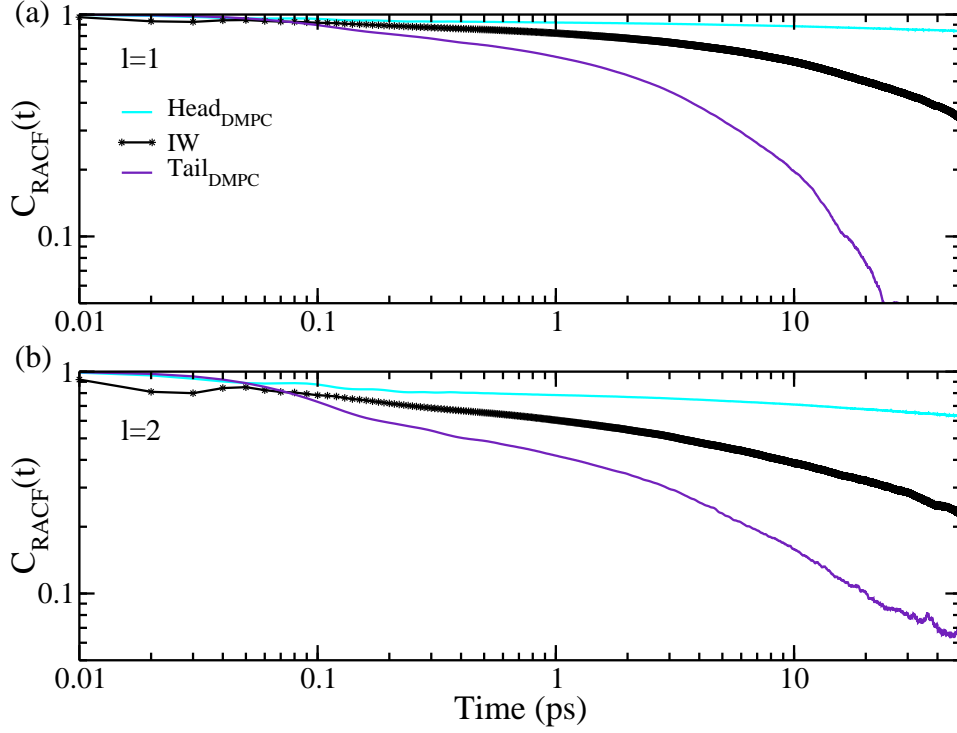

Figure S4: Reorientational auto correlation function (RACF) for a) first and b) second order Legendre polynomial for headgroup, tail and center of mass of DMPC and IW.

Table S2: Reorientation correlation relaxation time for head and tail of DMPC lipids. All correlation coefficients are  $>0.99$ .

|     | Region               | $A_f$ | $\tau_f$<br>(ps) | $A_s$ | $\tau_s$<br>(ps) |
|-----|----------------------|-------|------------------|-------|------------------|
| l=1 | Head <sub>DMPC</sub> | 0.09  | 50               | 0.90  | 637.07           |
|     |                      | 0.10  | 50               | 0.75  | 252.06           |
| l=1 | Tail <sub>DMPC</sub> | 0.48  | 2.75             | 0.36  | 14.32            |
|     |                      | 0.25  | 1.01             | 0.40  | 11.94            |
| l=1 | IW                   | 0.25  | 6.51             | 0.62  | 83.26            |
|     |                      | 0.29  | 3.05             | 0.42  | 77.83            |

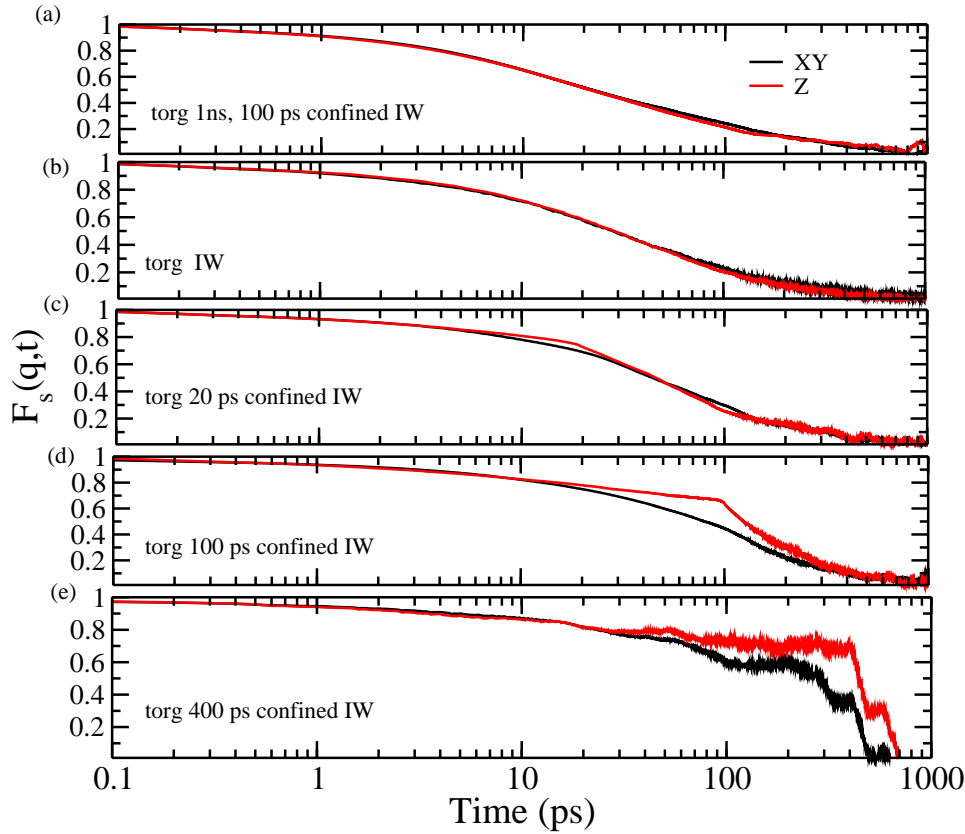

Figure S5:  $F_s(\mathbf{q}, t)$  of IW calculated along xy and z at  $= 1$  nm. Time origins (torg) are averaged in two ways. a) torg over entire 1 ns runlength for continuously residing IW for 100 ps . b)-e) torg over confinement time. b) IW for any frame, c) continuously residing IW for 20 ps , d) continuously residing IW for 100 ps, e) continuously residing IW for 400 ps.

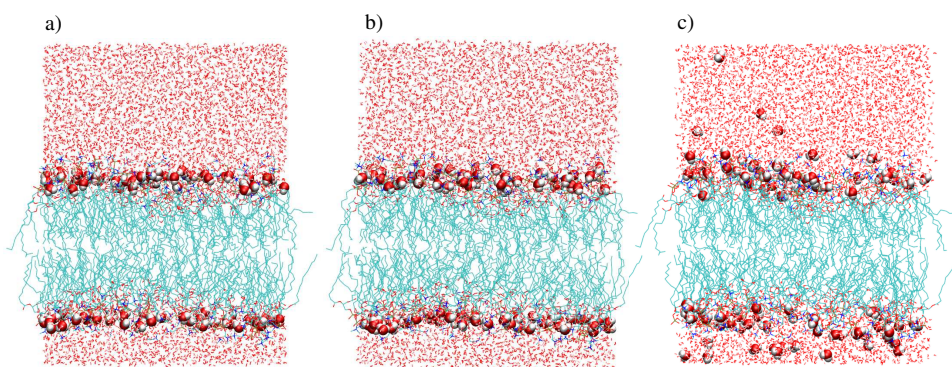

Figure S6: Snapshot of the DMPC bilayer at a) 50 ps, b) 100 ps, c) 150 ps. IW: CPK representation in red and white, DMPC lipids: line representations in cyan blue, remaining water: red dots.
